# Supplementary material for: Association between masseter muscle sarcopenia and postoperative pneumonia in patients with esophageal cancer
Source: PubMed Central journal article supplement (PMC9525668; doi:10.1038/s41598-022-20967-1), 2022-09-30
Supplement: 41598_2022_20967_MOESM1_ESM.pdf [file 41598_2022_20967_MOESM1_ESM.pdf]

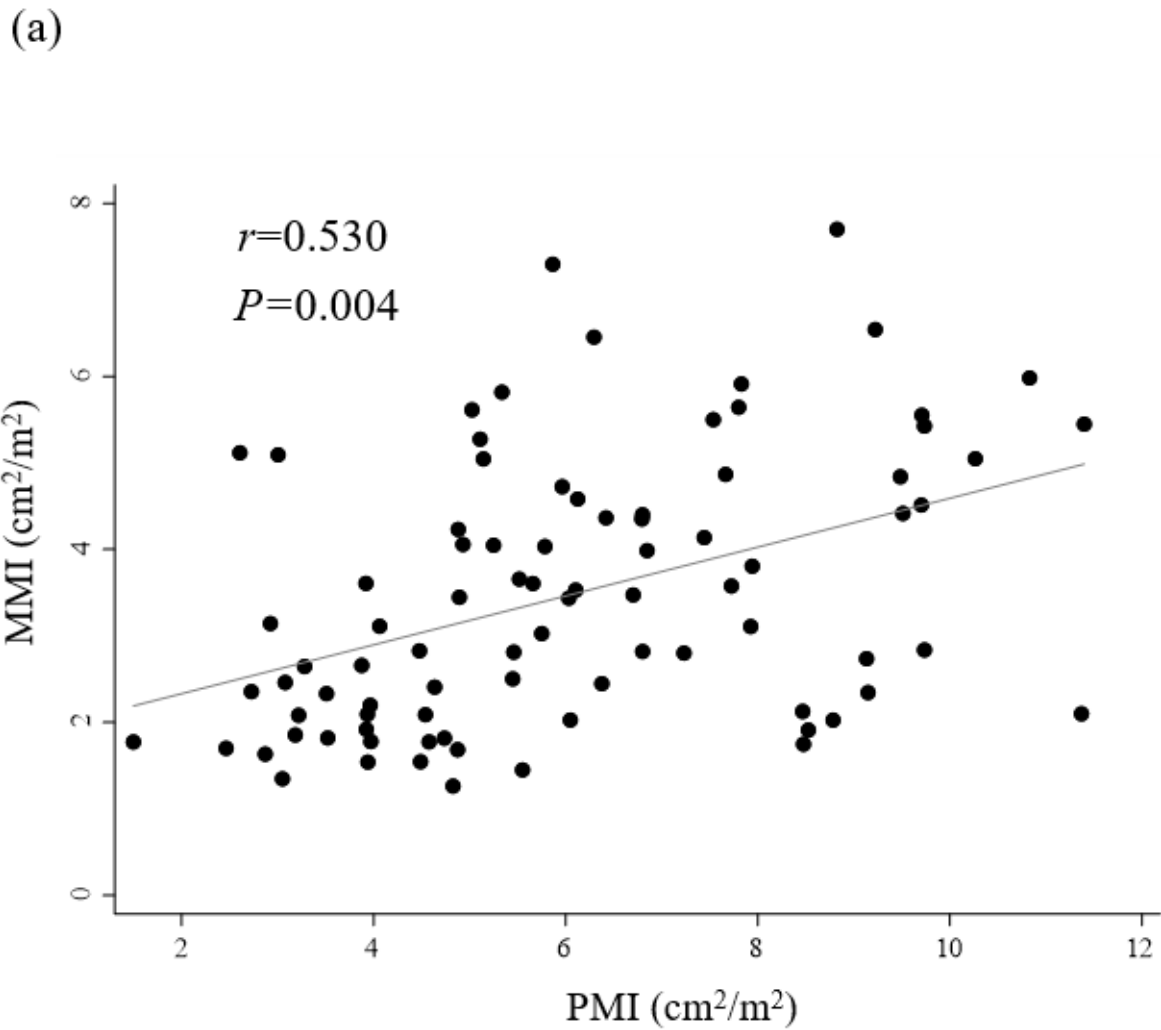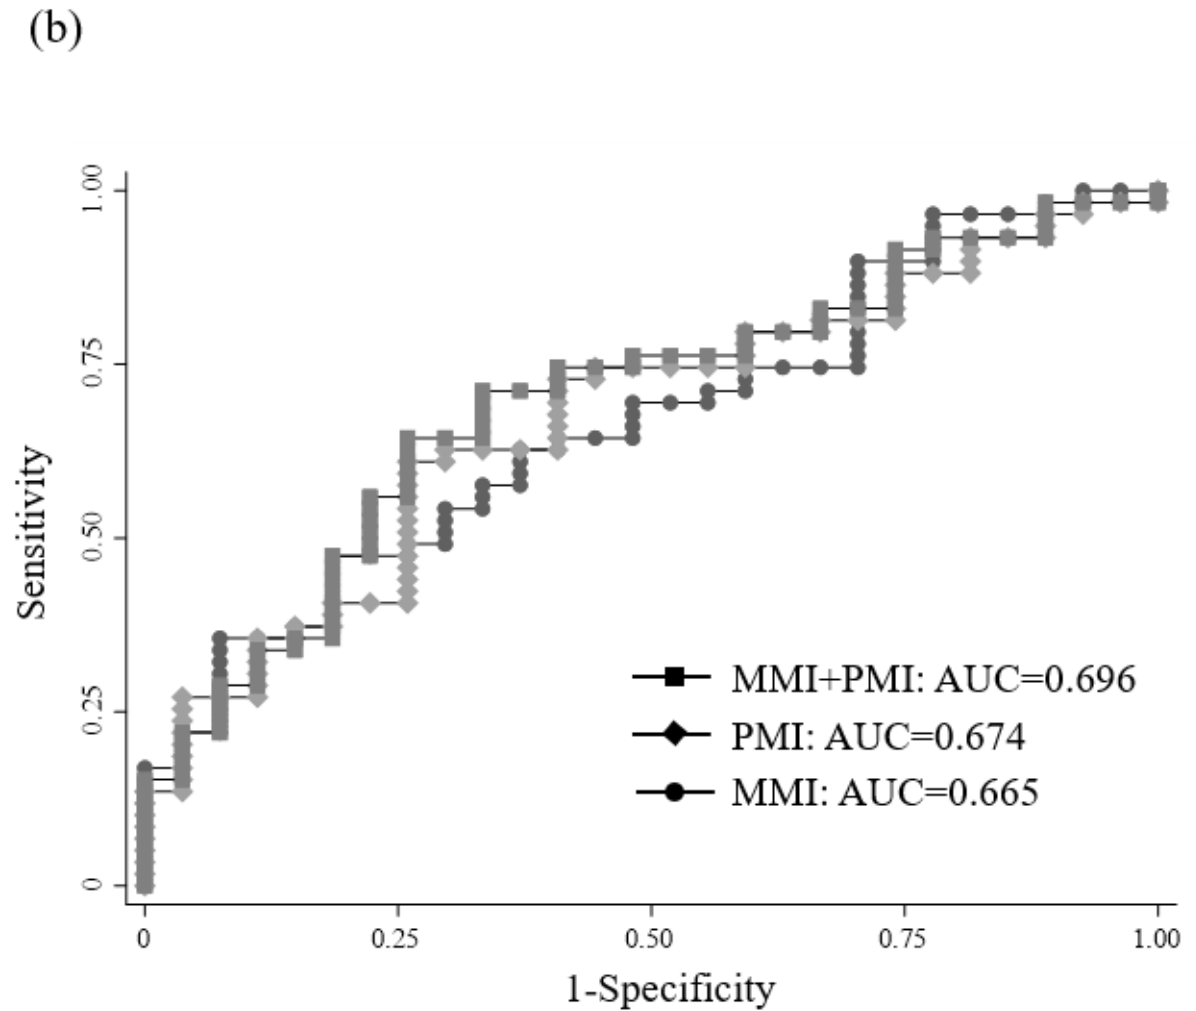

- (a) Masseter muscle index strongly and significantly correlated with L3-skeletal muscle index.
- (b) Receiver operating characteristic curves for the prediction of postoperative pneumonia in patients with esophageal cancer (masseter muscle index plus L3-skeletal muscle index vs. L3-skeletal muscle index alone vs. masseter muscle index alone).
